# Supplementary material for: The SAFE procedure: a practical stopping heuristic for active learning-based screening in systematic reviews and meta-analyses
Source: PubMed Central journal article supplement (PMC10908130; doi:10.1186/s13643-024-02502-7), 2024-03-01
Supplement: 13643_2024_2502_MOESM1_ESM.pdf [file 13643_2024_2502_MOESM1_ESM.pdf]

# Custom SAFE procedure Cheat Sheet

Fill in the blanks with your own models and parameters tailored to your review.

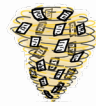

## DATASET

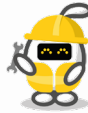

## MODEL

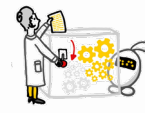

## PRIOR KNOWLEDGE

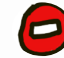

## STOPPING HEURISTIC(S)

### SCREEN RANDOM SET

- Partly label the dataset to warm-up the AI model;
- Get an indication of the fraction of relevant records (FRR\_T)

Random subset

-

-

- Screen a minimum of   % of the total number of papers;
- Find at least **one relevant record**.

### ACTIVE LEARNING

- Find as many relevant records as possible

Complete dataset

Simple model classifier:  
\_\_\_\_\_

feature extractor:  
\_\_\_\_\_

Labeled records phase 1

- All **key papers** have been marked as relevant;
- At least **twice** the estimate of the number of relevant records (   records) have been screened;
- A minimum of   % of the total dataset has been screened.
- No extra relevant records have been identified in the last    records.

### FIND MORE USING DEEP LEARNING

- Ensure that records are not missed due to suboptimal choice of the active learning model

Complete dataset

Deep learning model classifier:  
\_\_\_\_\_

feature extractor:  
\_\_\_\_\_

Labeled records phase 1 and 2

- No extra relevant records are identified in the last    records.

### EVALUATE QUALITY

- Avoid incorrectly excluded relevant records

All records labeled as irrelevant

Simple model (see phase 2)

The 10 highest- and lowest-ranked papers from phase 2

- No extra relevant records are identified in the last    records.
